# Supplementary material
Source: PubMed Central journal article supplement (PMC4959209)

**Supplemental Table 1.** Genes differentially expressed in wild-type *V. cholerae* grown at 37°C the shifted to 15°C or 25°C for 1 h. Differentially expressed genes were determined using SAM software with  $\geq 2.0$  fold change in gene expression and False Discovery Rate (FDR)  $\leq 0.03$ .

| Gene ID                                                         | Gene Name | FUNCTIONS                                                            | Fold Change |             |
|-----------------------------------------------------------------|-----------|----------------------------------------------------------------------|-------------|-------------|
|                                                                 |           |                                                                      | 15°C / 37°C | 25°C / 37°C |
| <b>Biofilm Formation</b>                                        |           |                                                                      |             |             |
| VC0916                                                          | vpsU      | <i>Vibrio</i> polysaccharide gene U                                  | 3.9         |             |
| VC0917                                                          | vpsA      | <i>Vibrio</i> polysaccharide gene A                                  | 7.2         |             |
| VC0918                                                          | vpsB      | <i>Vibrio</i> polysaccharide gene B                                  | 8.6         |             |
| VC0919                                                          | vpsC      | <i>Vibrio</i> polysaccharide gene C                                  | 6.0         |             |
| VC0921                                                          | vpsE      | <i>Vibrio</i> polysaccharide gene E                                  | 3.8         |             |
| VC0922                                                          | vpsF      | <i>Vibrio</i> polysaccharide gene F                                  | 7.2         |             |
| VC0924                                                          | vpsH      | <i>Vibrio</i> polysaccharide gene H                                  | 4.8         |             |
| VC0925                                                          | vpsI      | <i>Vibrio</i> polysaccharide gene I                                  | 6.6         |             |
| VC0926                                                          | vpsJ      | <i>Vibrio</i> polysaccharide gene J                                  | 6.8         |             |
| VC0927                                                          | vpsK      | <i>Vibrio</i> polysaccharide gene K                                  | 4.0         |             |
| VC0928                                                          | rbmA      | Rugosity and biofilm structure modulator A                           | 5.6         |             |
| VC0929                                                          | rbmB      | Rugosity and biofilm structure modulator B                           | 2.0         |             |
| VC0933                                                          | rbmF      | Rugosity and biofilm structure modulator F                           | 3.9         |             |
| VC0935                                                          | vpsM      | <i>Vibrio</i> polysaccharide gene M                                  | 6.0         |             |
| <b>Amino Acid Biosynthesis</b>                                  |           |                                                                      |             |             |
| VC0019                                                          | avtA      | Valine-pyruvate aminotransferase, avtA                               | 2.0         |             |
| VC0030                                                          | ilvM      | Acetolactate synthase II small subunit, ilvM                         | 0.3         |             |
| VC0390                                                          | metH      | 5-methyltetrahydrofolate--homocysteine methyltransferase, metH       |             | 2.3         |
| VC0391                                                          | lysC      | Aspartokinase III lysine-sensitive, lysC                             | 3.6         | 4.6         |
| VC0941                                                          | glyA-1    | Serine hydroxymethyltransferase, glyA-1                              |             | 4.6         |
| VC0991                                                          | asnB      | Asparagine synthetase B glutamine-hydrolyzing, asnB                  |             | 2.8         |
| VC1061                                                          |           | Cysteine synthase/cystathionine beta-synthase family protein         | 4.1         |             |
| VC1137                                                          | hisA      | Isomerase, hisA                                                      |             | 3.2         |
| VC1169                                                          | trpA      | Tryptophan synthase alpha subunit, trpA                              |             | 2.3         |
| VC1293                                                          | aspC      | Aspartate aminotransferase, aspC                                     |             | 4.0         |
| VC1671                                                          | metC      | Cystathionine beta-lyase, metC                                       |             | 3.2         |
| VC2036                                                          | asd       | Aspartate-semialdehyde dehydrogenase, asd                            |             | 2.7         |
| VC2116                                                          | aroC      | Chorismate synthase, aroC                                            |             | 2.5         |
| VC2152                                                          | dapE      | Succinyl-diaminopimelate desuccinylase, dapE                         |             | 3.3         |
| VC2273                                                          | proA      | Gamma-glutamyl phosphate reductase, proA                             | 0.5         |             |
| VC2329                                                          | dapD      | 2345-tetrahydropyridine-26-dicarboxylate N-succinyltransferase, dapD | 0.6         |             |
| VC2362                                                          | thrC      | Threonine synthase, thrC                                             | 0.5         |             |
| VC2373                                                          | gltB-1    | Glutamate synthase large subunit, gltB-1                             |             | 5.3         |
| VC2376                                                          | gltB-2    | Glutamate synthase large subunit, gltB-2                             | 2.0         |             |
| VC2481                                                          | serA      | D-3-phosphoglycerate dehydrogenase, serA                             |             | 11.0        |
| VC2493                                                          | leuD      | 3-isopropylmalate dehydratase small subunit, leuD                    | 0.5         |             |
| VC2618                                                          | argD      | Acetylornithine aminotransferase, argD                               | 10.2        | 6.2         |
| VC2746                                                          | glnA      | Glutamate ammonia ligase, glnA                                       |             | 2.9         |
| VCA0278                                                         | glyA-2    | Serine hydroxymethyltransferase, glyA-2                              | 2.5         | 3.3         |
| <b>Biosynthesis of cofactors prosthetic groups and carriers</b> |           |                                                                      |             |             |
| VC0064                                                          | thiS      | ThiS protein, thiS                                                   | 2.1         |             |
| VC0065                                                          | thiG      | ThiG protein, thiG                                                   | 2.2         |             |
| VC0468                                                          | gshB      | Glutathione synthetase, gshB                                         | 0.4         |             |
| VC0472                                                          | metK      | S-adenosylmethionine synthase, metK                                  | 0.2         |             |
| VC0626                                                          | hemL      | Heme porphyrin and cobalamin, hemL                                   | 0.3         |             |
| VC0889                                                          | dxs       | 1-deoxyxylulose-5-phosphate synthase, dxs                            | 0.5         |             |
| VC0943                                                          | lipA      | Lipoic acid synthetase, lipA                                         | 0.5         |             |
| VC0944                                                          | lipB      | Lipoate-protein ligase B, lipB                                       | 0.3         |             |
| VC1112                                                          | bioB      | Biotin synthase, bioB                                                | 0.4         |             |
| VC1114                                                          | bioC      | Biotin synthesis protein BioC, bioC                                  | 0.6         |             |
| VC1296                                                          | thiD      | Thiamine, phosphomethylpyrimidine kinase, thiD                       | 3.1         |             |
| VC1299                                                          |           | 6-pyruvoyl tetrahydrobiopterin synthase putative                     | 0.5         | 0.3         |
| VC1509                                                          | cobB      | Heme porphyrin and cobalamin, cobB                                   | 2.1         |             |
| VC1942                                                          | folD      | Folic acid, folD                                                     |             | 6.6         |
| VC1973                                                          | menB      | Naphthoate synthase, menB                                            | 0.5         |             |
| VC2180                                                          | hemA      | Glutamyl-tRNA reductase, hemA                                        | 0.3         |             |
| VC2308                                                          | thiJ      | Thiamine, thiJ                                                       | 0.5         |             |
| VC2422                                                          | nadC      | Pyridine nucleotides, nadC                                           | 0.5         |             |
| VCA0723                                                         | hmgA      | 3-hydroxy-3-methylglutaryl CoA reductase, hmgA                       | 0.5         |             |
| VCA0827                                                         | phhB      | pterin-4-alpha-carbinolamine dehydratase, phhB                       | 3.3         |             |
| <b>Cell envelope</b>                                            |           |                                                                      |             |             |

|         |      |                                                            |     |     |
|---------|------|------------------------------------------------------------|-----|-----|
| VC0212  | msbB | Biosynthesis/ degradation of surface polysaccharides, msbB | 0.4 |     |
| VC0259  | rfbV | Biosynthesis/ degradation of surface polysaccharides, rfbV | 0.5 | 0.3 |
| VC0344  | amiB | N-acetylmuramoyl-L-alanine amidase, amiB                   | 0.4 |     |
| VC0430  |      | Immunogenic protein                                        |     | 2.5 |
| VC0533  | nlpD | Lipoprotein NlpD, nlpD                                     |     | 3.0 |
| VC0700  | slt  | Soluble lytic murein transglycosylase, slt                 | 0.3 |     |
| VC0905  | yaeC | Lipoprotein YaeC, yaeC                                     |     | 2.3 |
| VC1195  |      | Lipoprotein putative                                       | 0.2 |     |
| VC1312  |      | Alanine racemase putative                                  |     | 0.3 |
| VC1537  | nlpC | Lipoprotein NlpC, nlpC                                     | 4.0 |     |
| VC2635  | mrcA | Penicillin-binding protein 1A, mrcA                        | 0.4 |     |
| VC2762  | glmU | Biosynthesis/ degradation of surface polysaccharides, glmU | 0.2 |     |
| VCA0572 | ddlA | D-alanine--D-alanine ligase, ddlA                          | 2.0 |     |
| VCA0867 | ompW | Outer membrane protein OmpW, ompW                          | 2.5 | 5.0 |

#### Chemotaxis and motility

|         |      |                                     |     |     |
|---------|------|-------------------------------------|-----|-----|
| VC0216  |      | Methyl-accepting chemotaxis protein |     | 2.2 |
| VC1313  |      | Methyl-accepting chemotaxis protein |     | 0.3 |
| VC1413  |      | Methyl-accepting chemotaxis protein |     | 8.9 |
| VC1898  |      | Methyl-accepting chemotaxis protein | 4.2 |     |
| VC2161  |      | Methyl-accepting chemotaxis protein |     | 2.4 |
| VC2187  | flaC | Flagellin FlaC, flaC                | 2.9 | 3.4 |
| VC2203  |      | Flagellar protein putative          |     | 2.6 |
| VCA0658 |      | Methyl-accepting chemotaxis protein | 0.3 |     |
| VCA0663 |      | Methyl-accepting chemotaxis protein | 0.4 |     |
| VCA0974 |      | Methyl-accepting chemotaxis protein | 0.5 |     |
| VCA1031 |      | Methyl-accepting chemotaxis protein |     | 0.1 |

#### Central intermediary metabolism

|         |      |                                                                  |     |     |
|---------|------|------------------------------------------------------------------|-----|-----|
| VC0238  |      | Transferase hexapeptide repeat family                            | 0.3 |     |
| VC0392  |      | Aminotransferase class V                                         |     | 3.8 |
| VC0454  |      | Glutaminase family protein                                       | 0.5 |     |
| VC0487  | glmS | Aminotransferase (isomerizing), glmS                             | 0.5 |     |
| VC0586  |      | Carbonic anhydrase putative                                      | 0.4 |     |
| VC0667  |      | Oxidoreductase Tas aldo/keto reductase family                    | 2.3 | 3.6 |
| VC0723  | ppk  | Phosphorus compounds, polyphosphate kinase, ppk                  | 0.2 |     |
| VC0748  |      | Aminotransferase NifS class V                                    | 2.0 |     |
| VC0979  |      | Oxidoreductase short-chain dehydrogenase/reductase family        | 2.0 |     |
| VC1119  |      | Oxidoreductase short-chain dehydrogenase/reductase family        | 8.9 |     |
| VC1184  |      | NifS-related protein                                             | 2.0 |     |
| VC2309  |      | Aminotransferase class V                                         | 0.4 |     |
| VC2545  | ppa  | Phosphorus compounds, inorganic pyrophosphatase, ppa             | 0.5 |     |
| VC2559  | cysN | Sulfur metabolism, sulfate adenylate transferase subunit 1, cysN | 0.4 |     |
| VCA0102 |      | CbbY family protein                                              | 2.0 |     |
| VCA0316 |      | Acetyltransferase putative                                       |     | 2.2 |
| VCA0496 |      | Glutathione S-transferase putative                               | 2.2 |     |
| VCA0523 |      | Aminotransferase class II                                        | 0.5 |     |
| VCA0614 | fhs  | Formate--tetrahydrofolate ligase, fhs                            | 0.6 |     |
| VCA0783 |      | Arylesterase                                                     | 2.0 |     |
| VCA0798 |      | CbbY family protein                                              | 3.4 |     |
| VCA0947 | speG | Spermidine n1-acetyltransferase, speG                            | 0.4 | 0.4 |

#### DNA metabolism

|        |        |                                                                   |     |     |
|--------|--------|-------------------------------------------------------------------|-----|-----|
| VC0167 | rep    | ATP-dependent DNA helicase Rep, rep                               | 0.3 |     |
| VC0215 | dfp    | DNA/pantothenate metabolism flavoprotein, dfp                     | 0.2 |     |
| VC0394 | uvrA   | Excinuclease ABC subunit A, uvrA                                  | 2.1 |     |
| VC0535 | mutS   | DNA mismatch repair protein MutS, mutS                            | 0.4 |     |
| VC0971 | ligA-1 | DNA ligase, ligA-1                                                | 0.4 |     |
| VC1011 | nth    | Endonuclease III, nth                                             | 0.4 |     |
| VC1056 | recR   | Recombination protein RecR, recR                                  | 0.5 |     |
| VC1765 |        | Restriction/modification, type I restriction enzyme HsdR putative | 0.3 |     |
| VC1846 | ruvA   | Holliday junction DNA helicase RuvA, ruvA                         |     | 2.3 |
| VC1886 | mfd    | Transcription-repair coupling factor, mfd                         | 0.4 |     |
| VC2360 | nfo    | Endonuclease IV, nfo                                              | 0.2 | 0.3 |
| VC2430 | parC   | Topoisomerase IV subunit A, parC                                  | 0.5 |     |
| VC2431 | parE   | Topoisomerase IV subunit B, parE                                  | 0.5 |     |

|                                               |        |                                                                        |      |      |
|-----------------------------------------------|--------|------------------------------------------------------------------------|------|------|
| VC2435                                        |        | MutT/nudix family protein                                              | 0.3  |      |
| VC2459                                        | recO   | DNA repair protein RecO, recO                                          | 4.6  |      |
| VC2502                                        | holC   | DNA polymerase III chi subunit, holC                                   | 0.4  |      |
| <b>Energy metabolism</b>                      |        |                                                                        |      |      |
| VC1242                                        | astE   | Succinylglutamate desuccinylase, astE                                  |      | 2.2  |
| VC1284                                        | celF   | 6-phospho-beta-glucosidase, celF                                       | 3.2  | 3.1  |
| VC1300                                        | sdaA-1 | L-serine dehydratase 1, sdaA-1                                         | 0.5  |      |
| VC1512                                        | fdhB   | Formate dehydrogenase iron-sulfur subunit, fdhB                        | 3.6  | 5.1  |
| VC1513                                        |        | Formate dehydrogenase alpha subunit putative authentic frameshift      | 2.0  |      |
| VC1558                                        | bglA   | 6-phospho-beta-glucosidase, bglA                                       |      | 2.2  |
| VC1726                                        | glgA   | Glycogen synthase, glgA                                                |      | 3.0  |
| VC1727                                        | glgC-1 | Glucose-1-phosphate adenylyltransferase, glgC-1                        |      | 3.7  |
| VC1905                                        | ald    | Alanine dehydrogenase, ald                                             |      | 3.8  |
| VC2616                                        | aruD   | Succinylglutamate 5-semialdehyde dehydrogenase, aruD                   | 11.3 |      |
| VC2698                                        | aspA   | Aspartate ammonia-lyase, aspA                                          |      | 0.3  |
| VCA0014                                       | malQ   | 4-alpha-glucanotransferase, malQ                                       |      | 7.3  |
| VCA0276                                       | gcvP   | Glycine cleavage system P protein, gcvP                                | 4.3  | 11.7 |
| VCA0277                                       | gcvH   | Glycine cleavage system H protein, gcvH                                | 3.1  | 6.0  |
| VCA0280                                       | gcvT   | Glycine cleavage system T protein, gcvT                                | 2.4  | 2.6  |
| VCA0875                                       | dsdA   | D-serine dehydratase, dsdA                                             |      | 2.3  |
| VCA0886                                       | kbl    | 2-amino-3-ketobutyrate coenzyme A ligase, kbl                          |      | 3.1  |
| <b>Electron transport</b>                     |        |                                                                        |      |      |
| VC0002                                        | mioc   | Electron transport, mioc protein, mioc                                 | 0.2  |      |
| VC0306                                        | trxA   | Thioredoxin, trxA                                                      | 0.5  | 0.4  |
| VC1013                                        |        | RnfG-related protein                                                   |      | 0.4  |
| VC1182                                        | trxB   | Thioredoxin reductase, trxB                                            | 0.4  |      |
| VC1254                                        |        | Iron-sulfur cluster-binding protein putative                           | 0.4  |      |
| VC1516                                        |        | Iron-sulfur cluster-binding protein                                    | 4.9  | 5.3  |
| VC1844                                        | cydA-1 | Cytochrome d ubiquinol oxidase subunit I, cydA-1                       | 0.4  |      |
| VCA0538                                       |        | Cytochrome b561 putative                                               | 8.5  |      |
| VCA0676                                       | napF   | Iron-sulfur cluster-binding protein NapF, napF                         | 0.4  |      |
| VCA0677                                       | napD   | NapD protein, napD                                                     | 0.4  |      |
| VCA0678                                       | napA   | Periplasmic nitrate reductase, napA                                    | 0.3  |      |
| VCA0679                                       | napB   | Periplasmic nitrate reductase cytochrome c-type protein, napB          | 0.3  |      |
| VCA0680                                       | napC   | Periplasmic nitrate reductase cytochrome c-type protein, napC          | 0.3  |      |
| VCA0752                                       | trxC   | Thioredoxin 2, trxC                                                    | 0.1  | 0.4  |
| <b>Fatty acid and phospholipid metabolism</b> |        |                                                                        |      |      |
| VC0295                                        | accC   | Acetyl-CoA carboxylase biotin carboxylase, accC                        | 0.4  |      |
| VC0296                                        | accB   | Acetyl-CoA carboxylase biotin carboxyl carrier protein, accB           | 0.5  |      |
| VC0745                                        |        | Inositol monophosphate family protein                                  | 0.1  |      |
| VC1000                                        | accD   | Acetyl-CoA carboxylase carboxyl transferase beta subunit, accD         | 0.5  |      |
| VC1046                                        | hadHB  | Degradation, fatty oxidation complex beta subunit, hadHB               | 2.7  |      |
| VC1122                                        | cfa    | Cyclopropane-fatty-acyl-phospholipid synthase, cfa                     | 2.9  | 2.6  |
| VC1483                                        | fabA   | 3-hydroxydecanoyl-(acyl-carrier-protein) dehydratase, fabA             | 0.4  |      |
| VC2020                                        | acp    | Acyl carrier protein, acp                                              | 0.4  |      |
| VC2109                                        | fabB   | 3-oxoacyl-(acyl-carrier-protein) synthase I authentic frameshift, fabB | 0.5  |      |
| VCA0751                                       | fabH-2 | 3-oxoacyl-(acyl-carrier-protein) synthase III, fabH-2                  | 2.6  |      |
| <b>Fermentation</b>                           |        |                                                                        |      |      |
| VC0551                                        | oadB-1 | Oxaloacetate decarboxylase beta subunit, oadB-1                        |      | 3.0  |
| VC0819                                        | aldA-1 | Aldehyde dehydrogenase, aldA-1                                         | 4.1  |      |
| VC1097                                        | pta    | Phosphate acetyltransferase, pta                                       | 0.2  |      |
| VC1098                                        | ackA-1 | Acetate kinase, ackA-1                                                 | 0.1  |      |
| VCA0235                                       | ackA-2 | Acetate kinase, ackA-2                                                 | 0.4  |      |
| <b>Glycolysis</b>                             |        |                                                                        |      |      |
| VC0336                                        | yibO   | Phosphoglycerate mutase 23-bisphosphoglycerate-independent, yibO       | 0.5  |      |
| VC0478                                        | fbaA   | Fructose-bisphosphate aldolase class II, fbaA                          |      | 2.8  |
| VC2544                                        | fbp    | Fructose-16-bisphosphatase, fbp                                        |      | 4.3  |
| VC2738                                        | pckA   | Phosphoenolpyruvate carboxykinase, pckA                                |      | 3.1  |
| VCA0843                                       | gapA-2 | Glyceraldehyde 3-phosphate dehydrogenase, gapA-2                       |      | 3.1  |
| VCA0987                                       | ppsA   | Phosphoenolpyruvate synthase, ppsA                                     |      | 2.3  |
| <b>TCA cycle</b>                              |        |                                                                        |      |      |

|        |      |                                                             |     |     |
|--------|------|-------------------------------------------------------------|-----|-----|
| VC0432 | mdh  | Malate dehydrogenase, mdh                                   |     | 3.8 |
| VC0604 | acnB | Aconitate hydratase 2, acnB                                 |     | 5.1 |
| VC1141 | icd  | Isocitrate dehydrogenase NADP-dependent monomeric type, icd |     | 2.7 |
| VC2084 | sucD | Succinyl-CoA synthase alpha subunit, sucD                   |     | 6.6 |
| VC2085 | sucC | Succinyl-CoA synthase beta subunit, sucC                    |     | 7.2 |
| VC2086 | sucB | 2-oxoglutarate dehydrogenase E2 component, sucB             |     | 4.3 |
| VC2087 | sucA | 2-oxoglutarate dehydrogenase E1 component, sucA             |     | 4.0 |
| VC2088 | sdhB | Succinate dehydrogenase iron-sulfur protein, sdhB           |     | 2.6 |
| VC2089 | sdhA | Succinate dehydrogenase flavoprotein subunit, sdhA          |     | 2.3 |
| VC2091 | sdhC | Succinate dehydrogenase cytochrome b556 subunit, sdhC       | 2.4 | 2.6 |
| VC2092 | gltA | Citrate synthase, gltA                                      | 3.5 | 4.3 |

#### Other metabolism

|         |        |                                                            |      |     |
|---------|--------|------------------------------------------------------------|------|-----|
| VC0473  | tktA-1 | Pentose phosphate pathway, transketolase 1, tktA-1         |      | 2.6 |
| VC1188  | sfcA   | Malate oxidoreductase, sfcA                                | 0.3  |     |
| VC1725  |        | Beta-ketoadipate enol-lactone hydrolase putative           | 2.9  |     |
| VC2350  | deoC   | Deoxyribose-phosphate aldolase, deoC                       | 0.4  | 0.1 |
| VC2413  | aceF   | Pyruvate dehydrogenase E2 component, aceF                  | 0.2  |     |
| VC2414  | aceE   | Pyruvate dehydrogenase E1 component, aceE                  | 0.2  |     |
| VC2613  | prkB   | Phosphoribulokinase, prkB                                  |      | 2.8 |
| VC2669  |        | 5-carboxymethyl-2-hydroxymuconate delta isomerase putative |      | 2.5 |
| VC2681  |        | Malate oxidoreductase putative                             | 0.3  | 0.2 |
| VCA0007 |        | 3-hydroxyisobutyrate dehydrogenase putative                |      | 2.7 |
| VCA0623 | talB   | Transaldolase B, talB                                      | 0.4  | 0.3 |
| VCA0657 | glpD   | Aerobic glycerol-3-phosphate dehydrogenase, glpD           | 13.0 |     |
| VCA0744 | gplK   | Glycerol kinase, gplK                                      | 5.6  | 4.9 |

#### Pathogenesis

|         |        |                                                       |     |     |
|---------|--------|-------------------------------------------------------|-----|-----|
| VC0824  | tagD   | TagD protein, tagD                                    | 0.3 |     |
| VC0826  | tcpP   | Toxin co-regulated pilus biosynthesis protein P, tcpP | 0.2 | 0.2 |
| VC0827  | tcpH   | Toxin co-regulated pilus biosynthesis protein H, tcpH |     | 0.3 |
| VC0828  | tcpA   | Toxin co-regulated pilin, tcpA                        | 0.3 |     |
| VC0838  | toxT   | TCP pilus virulence regulatory protein, toxT          |     | 0.3 |
| VC0839  | tcpJ   | Leader peptidase TcpJ, tcpJ                           |     | 0.3 |
| VC0840  | acfB   | Accessory colonization factor AcfB, acfB              |     | 0.4 |
| VC0841  | acfC   | Accessory colonization factor AcfC, acfC              | 0.4 | 0.3 |
| VC0959  |        | Hemolysin putative                                    |     | 0.4 |
| VC1450  | rtxC   | RTX toxin activating protein, rtxC                    | 0.2 | 0.2 |
| VC1456  | ctxB   | Cholera enterotoxin B subunit, ctxB                   | 0.5 |     |
| VC1457  | ctxA   | Cholera enterotoxin A subunit, ctxA                   | 0.4 |     |
| VCA0837 |        | Hemolysin putative                                    | 2.4 |     |
| VCA1043 | tagE-2 | TagE protein, tagE-2                                  | 2.8 |     |

#### Protein fate

|        |         |                                                   |     |      |
|--------|---------|---------------------------------------------------|-----|------|
| VC0018 | ibpA    | 16 kDa heat shock protein A, ibpA                 | 0.2 |      |
| VC0034 | tpcG    | Thiol:disulfide interchange protein, tpcG         | 0.3 |      |
| VC0046 | def-1   | Polypeptide deformylase, def-1                    | 0.5 |      |
| VC0067 |         | Aminopeptidase P                                  |     | 2.2  |
| VC0157 |         | Alkaline serine protease                          | 2.4 |      |
| VC0188 | prlC    | Oligopeptidase A, prlC                            | 0.3 |      |
| VC0566 | htrA    | Protease DO, htrA                                 | 0.5 | 0.3  |
| VC0711 | clpB-1  | ClpB protein, clpB-1                              | 0.2 | 0.3  |
| VC0717 |         | Protease putative                                 | 0.4 |      |
| VC0854 | grpE    | Heat shock protein GrpE, grpE                     | 0.2 |      |
| VC0855 | dnaK    | DnaK protein, dnaK                                | 0.0 | 0.2  |
| VC0856 | dnaJ    | DnaJ protein, dnaJ                                | 0.1 |      |
| VC0985 | htpG    | Heat shock protein HtpG, htpG                     | 0.1 | 0.1  |
| VC1039 | asmA    | AsmA protein, asmA                                | 0.4 |      |
| VC1414 |         | Thermostable carboxypeptidase 1                   |     | 2.7  |
| VC1494 | pepN    | Aminopeptidase N, pepN                            | 2.3 | 2.4  |
| VC1735 | aat     | Leucyl/phenylalanyl-tRNA protein transferase, aat | 0.2 |      |
| VC1756 |         | Periplasmic linker protein putative               | 0.2 |      |
| VC1920 | lon     | ATP-dependent protease LA, lon                    | 0.2 |      |
| VC1983 |         | Peptidase putative                                |     | 10.6 |
| VC2445 | exeA    | General secretion pathway protein A, exeA         | 2.4 |      |
| VC2664 | groEL-1 | Chaperonin 60 Kd subunit, groEL-1                 | 0.0 | 0.1  |
| VC2665 | groES-1 | Chaperonin 10 Kd subunit, groES-1                 | 0.0 | 0.1  |

|         |       |                                                     |     |     |
|---------|-------|-----------------------------------------------------|-----|-----|
| VC2674  | hslU  | Protease HslVU ATPase subunit HslU, hslU            | 0.3 |     |
| VC2675  | hslV  | Protease HslVU subunit HslV, hslV                   | 0.3 |     |
| VCA0150 | def-2 | Polypeptide deformylase, def-2                      | 0.1 | 0.2 |
| VCA0661 |       | Peptidyl-prolyl cis-trans isomerase-related protein | 0.4 |     |

### Protein synthesis

|         |        |                                                        |     |     |
|---------|--------|--------------------------------------------------------|-----|-----|
| VC0663  |        | Peptide chain release factor 2 , prfB                  | 0.4 |     |
| VC0631  | tyrS-2 | Tyrosyl-tRNA synthetase, tyrS-2                        | 0.4 |     |
| VC0643  | infB   | Initiation factor IF-2, infB                           | 2.4 |     |
| VC0645  | truB   | tRNA pseudouridine 55 synthase, truB                   | 4.3 |     |
| VC0659  | prfC   | Peptide chain release factor 3, prfC                   | 0.4 |     |
| VC0664  | lysU   | Lysyl-tRNA synthetase heat inducible, lysU             | 0.4 |     |
| VC0875  | proS   | Prolyl-tRNA synthetase, proS                           | 0.3 |     |
| VC0999  | truA   | tRNA pseudouridine synthase A, truA                    | 0.5 |     |
| VC1036  | metG   | Methionyl-tRNA synthetase, metG                        | 0.4 |     |
| VC1110  | serS   | Seryl-tRNA synthetase, serS                            | 0.4 |     |
| VC1209  |        | Elongation factor P family protein                     | 0.2 |     |
| VC1220  | pheT   | Phenylalanyl-tRNA synthetase beta chain, pheT          | 0.5 |     |
| VC1297  | asnS   | Asparaginyl-tRNA synthetase, asnS                      | 0.5 |     |
| VC1374  |        | DnaK-related protein                                   | 0.3 |     |
| VC1737  | infA   | Initiation factor IF-1, infA                           | 0.2 | 0.1 |
| VC1910  | miaE   | tRNA-(MS[2]IO[6]A)-hydroxylase, miaE                   |     | 0.4 |
| VC2028  | rluC   | Ribosomal large subunit pseudouridine synthase C, rluC |     | 0.3 |
| VC2214  | gltX   | Glutamyl-tRNA synthetase, gltX                         | 0.3 |     |
| VC2503  | valS   | Valyl-tRNA synthetase, valS                            | 0.3 |     |
| VC2623  | trpS   | Tryptophanyl-tRNA synthetase, trpS                     | 0.5 |     |
| VC2660  | efp    | Elongation factor P, efp                               | 0.5 | 0.4 |
| VCA0287 | thrS   | Threonyl-tRNA synthetase, thrS                         | 2.7 |     |

### Purines, pyrimidines, nucleosides, and nucleotides

|         |        |                                              |     |      |
|---------|--------|----------------------------------------------|-----|------|
| VC0052  | purE   | Purine ribonucleotide biosynthesis, purE     | 4.3 | 13.1 |
| VC0275  | purD   | Glycine ligase, purD                         |     | 7.9  |
| VC0276  | purH   | Purine ribonucleotide biosynthesis, purH     |     | 11.4 |
| VC0441  | apaH   | Bis(5-nucleosyl)-tetraphosphatase, apaH      | 2.7 |      |
| VC0585  | hpt    | Salvage of nucleosides and nucleotides, hpt  | 0.5 |      |
| VC0767  | guaB   | Inosine-5-monophosphate dehydrogenase, guaB  |     | 2.8  |
| VC0768  | guaA   | GMP synthase, guaA                           |     | 3.4  |
| VC0869  | purL   | Purine ribonucleotide biosynthesis, purL     |     | 16.4 |
| VC0986  | adk    | Adenylate kinase, adk                        | 0.3 | 0.4  |
| VC1004  | purF   | Amidophosphoribosyltransferase, purF         |     | 2.0  |
| VC1126  | purB   | Adenylosuccinate lyase, purB                 |     | 2.8  |
| VC1129  | gsk-1  | Inosine-guanosine kinase, gsk-1              | 0.2 | 0.2  |
| VC1167  | tdk    | Thymidine kinase, tdk                        | 0.3 |      |
| VC1228  | purT   | Purine ribonucleotide biosynthesis, purT     |     | 8.0  |
| VC1255  | nrdB   | 2-Deoxyribonucleotide metabolism, nrdB       | 0.4 |      |
| VC1256  | nrdA   | 2-Deoxyribonucleotide metabolism, nrdA       | 0.4 |      |
| VC1992  | purU   | Formyltetrahydrofolate deformylase, purU     | 2.6 |      |
| VC2016  | tmk    | Thymidylate kinase, tmk                      | 0.4 |      |
| VC2183  | prsA   | Ribose-phosphate pyrophosphokinase, prsA     | 0.2 |      |
| VC2225  | upp    | Salvage of nucleosides and nucleotides, upp  | 0.4 |      |
| VC2226  | purM   | Purine ribonucleotide biosynthesis, purM     | 3.0 | 17.7 |
| VC2227  | purN   | Purine ribonucleotide biosynthesis, purN     |     | 26.9 |
| VC2277  | gpt    | Salvage of nucleosides and nucleotides, gpt  | 0.5 |      |
| VC2347  | deoD-1 | Purine nucleoside phosphorylase, deoD-1      | 0.3 | 0.3  |
| VC2348  | deoB   | Phosphopentomutase, deoB                     | 0.5 | 0.3  |
| VC2349  | deoA   | Thymidine phosphorylase, deoA                | 0.4 | 0.3  |
| VC2390  | carA   | Pyrimidine ribonucleotide biosynthesis, carA |     | 2.7  |
| VC2510  | pyrB   | Pyrimidine ribonucleotide biosynthesis, pyrB | 2.4 | 14.7 |
| VC2511  | pyrI   | Pyrimidine ribonucleotide biosynthesis, pyrI |     | 7.6  |
| VCA0053 | deoD-2 | Purine nucleoside phosphorylase, deoD-2      | 0.5 | 0.3  |
| VCA0197 | guaC   | GMP reductase, guaC                          | 0.4 |      |
| VCA0801 | gsk-2  | Inosine-guanosine kinase, gsk-2              |     | 0.3  |
| VCA0925 | pyrC   | Dihydroorotase, pyrC                         |     | 2.7  |

### Regulatory functions

|        |     |                                               |     |     |
|--------|-----|-----------------------------------------------|-----|-----|
| VC0290 | fis | Factor-for-inversion stimulation protein, fis | 0.1 | 0.1 |
| VC0307 | rho | Transcription termination factor Rho, rho     | 0.4 |     |

|         |      |                                                       |      |      |
|---------|------|-------------------------------------------------------|------|------|
| VC0328  | rpoB | DNA-directed RNA polymerase beta subunit, rpoB        | 0.4  |      |
| VC03291 | rpoC | DNA-directed RNA polymerase beta subunit, rpoC        | 0.3  |      |
| VC03292 | rpoC | DNA-directed RNA polymerase beta subunit, rpoC        | 0.4  |      |
| VC0330  | rsd  | Regulator of sigma D, rsd                             | 2.9  | 2.6  |
| VC0347  |      | RNA-binding protein, hfq                              | 2.3  |      |
| VC0594  | pcnB | PolyA polymerase, pcnB                                | 0.6  |      |
| VC0601  | hrpB | ATP-dependent helicase HrpB, hrpB                     | 0.5  |      |
| VC0644  | rbfA | RNA processing, ribosome-binding factor A, rbfA       | 4.6  |      |
| VC0647  | pnp  | Polyribonucleotide nucleotidyltransferase, pnp        | 3.8  |      |
| VC0693  |      | Response regulator                                    |      | 2.4  |
| VC0706  |      | Sigma-54 modulation protein putative                  | 0.3  |      |
| VC0812  |      | Helicase-related protein                              | 0.6  |      |
| VC1021  | luxO | LuxO repressor protein, luxO                          | 0.2  |      |
| VC1142  | cspD | Cold shock-like protein CspD, cspD                    |      | 11.7 |
| VC1222  | himA | Integration host factor alpha subunit, himA           | 2.2  |      |
| VC1320  |      | DNA-binding response regulator                        | 0.5  |      |
| VC1796  |      | Middle operon regulator-related protein               | 2.6  |      |
| VC1904  | lrp  | Leucine-responsive regulatory protein, lrp            | 2.7  |      |
| VC1907  | cysB | Cys regulon Transcriptional activator, cysB           | 2.1  |      |
| VC2302  |      | RNA polymerase sigma-70 factor ECF subfamily          | 2.0  | 2.2  |
| VC2415  | pdhR | Pyruvate dehydrogenase complex repressor, pdhR        | 0.3  |      |
| VC2433  | cpdA | Cyclic AMP phosphodiesterase, cpdA                    | 0.4  |      |
| VC2466  | rseA | Sigma-E factor negative regulatory protein RseA, rseA | 2.0  |      |
| VC2530  |      | Sigma-54 modulation protein putative                  |      | 2.4  |
| VC2533  | ptsO | Phosphocarrier protein NPr, ptsO                      | 0.2  |      |
| VC2709  | rpoZ | DNA-directed RNA polymerase omega subunit, rpoZ       |      | 0.5  |
| VC2744  | typA | GTP-binding protein TypA, typA                        | 0.5  |      |
| VCA0166 | cspA | Cold shock Transcriptional regulator CspA, cspA       | 2.9  |      |
| VCA0519 | fruR | Fructose repressor, fruR                              | 0.4  | 0.2  |
| VCA0607 |      | Regulator of nucleoside diphosphate kinase            | 0.6  |      |
| VCA0709 | torS | Sensor protein TorS, torS                             | 0.4  |      |
| VCA0804 | deaD | ATP-dependent RNA helicase DeaD, deaD                 | 6.5  |      |
| VCA0933 | cspV | Cold shock domain family protein                      | 51.2 | 2.6  |
| VCA0990 |      | ATP-dependent RNA helicase DEAD box family            |      | 8.3  |
| VCA1087 |      | Anti-sigma F factor antagonist putative               | 0.5  |      |

#### Transcriptional regulators

|         |      |                                                       |     |     |
|---------|------|-------------------------------------------------------|-----|-----|
| VC0166  |      | Transcriptional regulator, TetR family                | 0.3 |     |
| VC0278  |      | Transcriptional regulator, CadC putative              | 0.3 |     |
| VC0583  | hapR | Transcription factor, hapR                            | 0.2 |     |
| VC0649  |      | Transcriptional regulator, MarR family                | 2.0 |     |
| VC0665  | vpsR | Transcriptional regulator, sigma-54 dependent vpsR    | 2.2 |     |
| VC0677  | nhaR | Transcriptional activator protein NhaR, nhaR          | 2.0 |     |
| VC0701  |      | trp operon repressor putative                         | 0.3 |     |
| VC1213  |      | Transcriptional regulator, LuxR family                | 2.1 |     |
| VC1968  |      | Transcriptional regulator, HTH3 family                | 2.3 |     |
| VC2485  |      | Transcriptional regulator, LysR family                | 0.4 | 0.3 |
| VC2636  |      | Transcriptional regulator, LysR family                | 2.0 |     |
| VC2647  | aphA | Transcriptional regulator, PadR N-terminal-like, aphA | 7.3 |     |
| VC2702  |      | Transcriptional regulator, LuxR family                | 2.4 | 5.3 |
| VCA0542 |      | Transcriptional regulator, LysR family                | 0.5 |     |
| VCA0575 |      | Transcriptional regulator, LysR family                | 2.2 |     |
| VCA0642 |      | Transcriptional regulator, ArsR family                |     | 3.0 |
| VCA0888 |      | Transcriptional regulator, LuxR family                | 2.8 |     |
| VCA0952 | vpsT | Transcriptional regulator, LuxR family, vpsT          | 2.4 | 0.3 |

#### Amino Acid transport and binding

|        |        |                                                                   |     |     |
|--------|--------|-------------------------------------------------------------------|-----|-----|
| VC0171 |        | Peptide ABC transporter periplasmic peptide-binding protein       |     | 2.6 |
| VC1091 | oppA   | Oligopeptide ABC transporter, oppA                                |     | 4.8 |
| VC1092 | oppB   | Oligopeptide ABC transporter permease protein, oppB               |     | 4.1 |
| VC1093 | oppC   | Oligopeptide ABC transporter permease protein, oppC               |     | 4.4 |
| VC1094 | oppD   | Oligopeptide ABC transporter ATP-binding protein, oppD            |     | 4.4 |
| VC1095 | oppF   | Oligopeptide ABC transporter ATP-binding protein, oppF            |     | 6.6 |
| VC1362 |        | Amino acid ABC transporter periplasmic amino acid-binding protein | 5.4 | 4.5 |
| VC1422 |        | Sodium/alanine symporter                                          | 2.8 |     |
| VC1658 | sdaC-2 | Serine transporter, sdaC-2                                        |     | 0.4 |
| VC1680 | sapA   | Peptide ABC transporter periplasmic peptide-binding protein, sapA | 0.4 |     |

|         |      |                                                                     |     |     |
|---------|------|---------------------------------------------------------------------|-----|-----|
| VC1863  |      | Amino acid ABC transporter periplasmic amino acid-binding protein   | 2.7 | 2.3 |
| VC1864  |      | Amino acid ABC transporter ATP-binding protein                      | 4.7 | 5.0 |
| VC2537  |      | Thiamine ABC transporter ATP-binding protein putative               | 0.5 |     |
| VC2538  |      | Thiamine ABC transporter permease protein putative                  | 0.4 |     |
| VCA0759 | artI | Arginine ABC transporter periplasmic arginine-binding protein, artI | 3.6 | 8.8 |
| VCA0978 |      | Amino acid ABC transporter periplasmic amino acid-binding protein   | 2.0 |     |

#### Anion/ cation transport and binding

|         |        |                                                                     |     |     |
|---------|--------|---------------------------------------------------------------------|-----|-----|
| VC0475  | irgA   | Enterobactin receptor, irgA                                         | 0.4 |     |
| VC0608  |        | Iron(III) ABC transporter periplasmic iron-compound-binding protein |     | 2.2 |
| VC0724  | pstC-1 | Phosphate ABC transporter permease protein, pstC-1                  | 0.5 |     |
| VC1264  |        | Iron-regulated protein A putative                                   | 0.4 |     |
| VC1437  |        | Cation transport ATPase E1-E2 family                                | 2.2 |     |
| VC1544  | tonB2  | TonB2 protein, tonB2                                                | 0.3 |     |
| VC1545  | exbD2  | TonB system transport protein ExbD2, exbD2                          | 0.3 |     |
| VC1546  | exbB2  | TonB system transport protein ExbB2, exbB2                          | 0.5 |     |
| VC1547  |        | Biopolymer transport protein ExbB-related protein                   | 0.3 |     |
| VC1627  | nhaA   | Na <sup>+</sup> /H <sup>+</sup> antiporter protein, nhaA            | 2.2 |     |
| VC1655  | mgE-1  | Magnesium transporter, mgE-1                                        | 0.3 | 0.1 |
| VC1757  |        | Transporter AcrB/D/F family                                         | 0.5 |     |
| VC2082  | znuC   | Zinc ABC transporter ATP-binding protein, znuC                      | 3.1 |     |
| VC2442  |        | pho4 family protein                                                 | 0.5 |     |
| VCA0227 | vctP   | Vibriobactin and enterobactin ABC transporter, vctP                 | 0.3 |     |
| VCA0576 | hutA   | Heme transport protein HutA, hutA                                   | 0.4 |     |

#### Carbohydrate transport and binding

|         |        |                                                      |     |     |
|---------|--------|------------------------------------------------------|-----|-----|
| VC0910  | treB   | PTS system trehalose-specific IIBC component, treB   |     | 2.4 |
| VC1235  |        | sodium/dicarboxylate symporter                       | 0.2 | 0.1 |
| VC1695  |        | Formate transporter 1 putative                       | 0.2 |     |
| VC1779  | dctP-1 | C4-dicarboxylate-binding periplasmic protein, dctP-1 | 6.1 |     |
| VC1823  | frwB   | PTS system fructose-specific IIB component, frwB     | 2.6 | 4.6 |
| VC2013  | ptsG   | PTS system glucose-specific IIBC component, ptsG     | 0.5 |     |
| VCA0516 | fruA-2 | PTS system fructose-specific IIBC component, fruA-2  | 0.2 | 0.1 |
| VCA0518 | fruB   | PTS system fructose-specific IIA/FPR component, fruB | 0.3 | 0.3 |
| VCA0943 | malG   | Maltose ABC transporter permease protein, malG       | 0.5 | 4.3 |
| VCA0945 | malE   | Maltose ABC transporter, malE                        | 0.4 | 5.0 |
| VCA0946 | malK   | Maltose/maltodextrin ABC transporter , malK          | 0.4 |     |
| VCA1028 | ompS   | Maltoporin, ompS                                     |     | 3.0 |

#### Spermidine/putrescine transport and binding

|        |        |                                                                 |     |  |
|--------|--------|-----------------------------------------------------------------|-----|--|
| VC1424 | potD-1 | Spermidine/putrescine ABC transporter, potD-1                   | 0.4 |  |
| VC1425 | potD-2 | Spermidine/putrescine ABC transporter, potD-2                   | 0.1 |  |
| VC1426 | potC   | Spermidine/putrescine ABC transporter permease protein, potC    | 0.3 |  |
| VC1427 | potB   | Spermidine/putrescine ABC transporter permease protein, potB    | 0.2 |  |
| VC1428 | potA   | Spermidine/putrescine ABC transporter ATP-binding protein, potA | 0.3 |  |

#### Other transport and binding

|         |        |                                                          |     |     |
|---------|--------|----------------------------------------------------------|-----|-----|
| VC0589  |        | ABC transporter ATP-binding protein                      | 0.2 |     |
| VC0590  |        | Permease putative                                        | 0.5 |     |
| VC0698  |        | ABC transporter ATP-binding protein                      | 0.4 |     |
| VC0972  |        | Porins, porin putative                                   | 2.8 |     |
| VC1103  |        | ABC transporter ATP-binding protein                      | 3.4 |     |
| VC1168  | gltP-1 | Proton/glutamate symporter, gltP-1                       | 2.0 | 3.0 |
| VC1180  | cydC   | Transport ATP-binding protein CydC, cydC                 | 0.5 |     |
| VC1447  | rtxD   | RTX toxin transporter, rtxD                              | 0.4 |     |
| VC1630  |        | ABC transporter ATP-binding protein                      |     | 0.3 |
| VC1660  |        | ABC transporter ATP-binding protein putative             |     | 2.6 |
| VC1854  | ompT   | OmpT protein, ompT                                       |     | 6.1 |
| VC1878  | msbA   | Transport ATP-binding protein MsbA, msbA                 | 0.5 |     |
| VC2162  |        | Permease PerM putative                                   | 3.2 |     |
| VC2171  | uraA   | Uracil permease, uraA                                    | 0.4 |     |
| VC2305  | ompK   | Outer membrane protein OmpK, ompK                        | 0.5 |     |
| VC2761  |        | Multidrug resistance protein                             |     | 0.4 |
| VCA0179 |        | Nucleosides purines and pyrimidines, NupC family protein | 0.4 | 0.3 |
| VCA0214 | emrD-2 | Multidrug resistance protein D, emrD-2                   | 5.1 | 2.6 |
| VCA0782 |        | ABC transporter ATP-binding protein                      | 2.3 |     |
| VCA0807 |        | ABC transporter periplasmic substrate-binding protein    |     | 4.2 |

|                          |        |                                                                |      |     |
|--------------------------|--------|----------------------------------------------------------------|------|-----|
| VCA0904                  |        | Permease                                                       | 3.0  |     |
| <b>Type VI secretion</b> |        |                                                                |      |     |
| VC1415                   | hcp-1  | Hemolysin-coregulated protein, hcp-1                           | 0.2  |     |
| VCA0017                  | hcp2   | Hemolysin-coregulated protein, hcp-2                           | 0.0  |     |
| VCA0107                  | vipA   | Hypothetical, vipA                                             | 0.3  | 2.4 |
| VCA0108                  | vipB   | Hypothetical, vipB                                             | 0.3  | 2.6 |
| VCA0109                  |        | Hypothetical                                                   | 0.2  | 2.9 |
| VCA0112                  | fha    | Hypothetical, fha                                              | 0.4  | 3.4 |
| VCA0114                  | vasE   | Hypothetical, vasE                                             | 0.5  | 2.9 |
| VCA0119                  | vasJ   | Hypothetical, vasJ                                             | 0.3  |     |
| VCA0120                  | vasK   | Hypothetical, vasK                                             | 0.5  |     |
| <b>Other functions</b>   |        |                                                                |      |     |
| VC0003                   | thdF   | Thiophene and furan oxidation protein ThdF, thdF               | 0.6  |     |
| VC0036                   |        | FixG-related protein                                           |      | 2.2 |
| VC0039                   |        | SpoOM-related protein                                          | 2.0  |     |
| VC0049                   | smg    | Smg protein, smg                                               | 2.0  |     |
| VC0255                   |        | rfbT-related protein                                           | 2.8  |     |
| VC0258                   | rfbT   | rfbT protein, rfbT                                             | 3.1  |     |
| VC0291                   |        | NifR3/Smm1 family protein                                      | 0.3  | 0.3 |
| VC0348                   | hflX   | GTP-binding protein HflX, hflX                                 | 2.0  |     |
| VC0437                   |        | GTP1/Obg family protein                                        | 3.1  |     |
| VC0446                   | imp    | Organic solvent tolerance protein, imp                         | 0.2  |     |
| VC0627                   |        | HesB family protein                                            | 0.5  |     |
| VC0687                   |        | Carbon starvation protein A putative                           | 4.1  |     |
| VC0731                   |        | Detoxification, antioxidant AhpC/Tsa family                    | 0.2  |     |
| VC0750                   |        | HesB family protein                                            | 2.5  |     |
| VC0763                   |        | GTP-binding protein                                            | 2.9  |     |
| VC0851                   | smpA   | Small protein A, smpA                                          | 3.1  |     |
| VC0864                   | yfhC   | YfhC protein, yfhC                                             | 0.5  |     |
| VC0870                   | tnpA   | IS1004 transposase, tnpA                                       | 2.7  |     |
| VC1003                   |        | Bacteriocin production protein                                 |      | 4.6 |
| VC1022                   | luxU   | Phosphorelay protein, luxU                                     | 0.2  |     |
| VC1037                   | mrp    | Mrp protein, mrp                                               | 0.4  |     |
| VC1455                   | rstR-1 | Transcriptional repressor RstR, rstR-1                         | 3.3  |     |
| VC1470                   | tlcR-1 | TlcR protein, tlcR-1                                           | 0.4  |     |
| VC1532                   |        | ROK family protein                                             |      | 2.2 |
| VC1579                   |        | Enterobactin synthetase component F-related protein            | 0.2  | 0.3 |
| VC1599                   |        | GGDEF family protein                                           |      | 5.2 |
| VC1676                   | pspC   | Phage shock protein C, pspC                                    | 0.3  |     |
| VC1677                   | pspB   | Phage shock protein B, pspB                                    | 0.5  |     |
| VC1696                   |        | DNA-binding protein inhibitor Id-2-related protein             |      | 2.9 |
| VC1736                   |        | Arginyl-tRNA-protein transferase-related protein               | 0.4  |     |
| VC1998                   |        | PilB-related protein                                           | 0.3  |     |
| VC2153                   |        | DD-carboxypeptidase-related protein                            |      | 3.7 |
| VC2160                   | bcp    | Dactinoferritin comigratory protein, bcp                       | 0.4  |     |
| VC2361                   |        | Formate acetyl transferase-related protein                     | 0.3  |     |
| VC2774                   | gidB   | Glucose inhibited division protein B, gidB                     | 0.5  |     |
| VCA0175                  |        | MoxR-related protein                                           | 0.4  |     |
| VCA0308                  |        | Eeoxyguanosinetriphosphate triphosphohydrolase-related protein | 0.5  |     |
| VCA0324                  | dinJ   | DNA-damage-inducible protein J, dinJ                           | 0.5  |     |
| VCA0337                  | mccF-1 | Microcin immunity protein MccF, mccF-1                         | 2.3  |     |
| VCA0387                  |        | Toxin resistance protein                                       | 2.0  |     |
| VCA0439                  | mccF-2 | Microcin immunity protein MccF, mccF-2                         | 2.0  |     |
| VCA0493                  | tnpA   | IS1004 transposase, tnpA                                       | 2.7  |     |
| VCA0549                  | phnA   | PhnA protein, phnA                                             | 0.4  |     |
| VCA0628                  |        | SecA-related protein                                           |      | 2.3 |
| VCA0633                  | glpM   | GlpM protein glpM                                              |      | 7.2 |
| VCA1006                  |        | Organic hydroperoxide resistance protein putative              | 3.8  |     |
| <b>Hypothetical</b>      |        |                                                                |      |     |
| VC0025                   |        | Hypothetical protein                                           | 14.7 | 3.9 |
| VC0038                   |        | Hypothetical protein                                           | 2.2  | 2.6 |
| VC0184                   |        | Hypothetical protein                                           | 3.3  |     |
| VC0292                   |        | Hypothetical protein                                           | 0.5  |     |
| VC0343                   |        | Hypothetical protein                                           | 0.4  |     |



|        |                      |     |      |
|--------|----------------------|-----|------|
| VC0491 | Hypothetical protein | 0.4 |      |
| VC0549 | Hypothetical protein |     | 4.6  |
| VC0600 | Hypothetical protein | 0.5 |      |
| VC0712 | Hypothetical protein | 2.1 |      |
| VC0714 | Hypothetical protein | 2.8 |      |
| VC0764 | Hypothetical protein | 4.4 |      |
| VC0823 | Hypothetical protein | 2.0 |      |
| VC0862 | Hypothetical protein | 0.5 |      |
| VC0886 | Hypothetical protein | 0.2 |      |
| VC0901 | Hypothetical protein | 0.5 |      |
| VC0922 | Hypothetical protein | 7.2 |      |
| VC0926 | Hypothetical protein | 6.8 |      |
| VC0928 | Hypothetical protein | 5.6 |      |
| VC0933 | Hypothetical protein | 3.9 |      |
| VC0935 | Hypothetical protein | 6.0 |      |
| VC1077 | Hypothetical protein | 0.4 |      |
| VC1078 | Hypothetical protein | 0.4 |      |
| VC1125 | Hypothetical protein | 3.4 | 3.1  |
| VC1158 | Hypothetical protein | 2.6 | 3.9  |
| VC1183 | Hypothetical protein | 2.0 |      |
| VC1191 | Hypothetical protein | 3.1 |      |
| VC1224 | Hypothetical protein | 3.0 |      |
| VC1246 | Hypothetical protein | 0.5 |      |
| VC1247 | Hypothetical protein | 2.2 |      |
| VC1266 | Hypothetical protein | 0.4 |      |
| VC1272 | Hypothetical protein | 0.1 | 0.3  |
| VC1368 | Hypothetical protein | 2.4 |      |
| VC1371 | Hypothetical protein | 3.6 |      |
| VC1380 | Hypothetical protein | 0.5 |      |
| VC1438 | Hypothetical protein | 2.0 |      |
| VC1449 | Hypothetical protein | 0.2 | 0.2  |
| VC1471 | Hypothetical protein | 5.8 |      |
| VC1479 | Hypothetical protein | 2.8 |      |
| VC1480 | Hypothetical protein | 2.4 |      |
| VC1493 | Hypothetical protein | 6.5 |      |
| VC1510 | Hypothetical protein | 2.1 |      |
| VC1514 | Hypothetical protein | 3.1 |      |
| VC1517 | Hypothetical protein | 6.1 | 3.1  |
| VC1518 | Hypothetical protein | 6.2 |      |
| VC1543 | Hypothetical protein | 0.2 |      |
| VC1548 | Hypothetical protein | 0.2 |      |
| VC1559 | Hypothetical protein | 0.5 |      |
| VC1564 | Hypothetical protein | 0.4 |      |
| VC1577 | Hypothetical protein | 0.2 | 0.3  |
| VC1578 | Hypothetical protein | 0.1 | 0.3  |
| VC1642 | Hypothetical protein | 0.2 |      |
| VC1654 | Hypothetical protein | 0.3 |      |
| VC1738 | Hypothetical protein | 0.4 |      |
| VC1743 | Hypothetical protein | 2.0 |      |
| VC1780 | Hypothetical protein | 3.4 |      |
| VC1808 | Hypothetical protein |     | 2.2  |
| VC1810 | Hypothetical protein | 2.6 |      |
| VC1943 | Hypothetical protein |     | 11.0 |
| VC1964 | Hypothetical protein | 4.9 |      |
| VC1999 | Hypothetical protein | 0.2 |      |
| VC2002 | Hypothetical protein |     | 8.3  |
| VC2010 | Hypothetical protein | 2.0 |      |
| VC2011 | Hypothetical protein |     | 5.4  |
| VC2149 | Hypothetical protein | 0.3 |      |
| VC2154 | Hypothetical protein | 2.1 | 3.1  |
| VC2155 | Hypothetical protein | 5.6 |      |
| VC2221 | Hypothetical protein | 0.3 |      |
| VC2357 | Hypothetical protein |     | 3.0  |
| VC2388 | Hypothetical protein | 3.2 |      |
| VC2395 | Hypothetical protein | 2.0 |      |
| VC2486 | Hypothetical protein | 0.4 |      |
| VC2509 | Hypothetical protein |     | 5.5  |

|           |                      |      |     |
|-----------|----------------------|------|-----|
| VC2543    | Hypothetical protein |      | 3.4 |
| VC2605    | Hypothetical protein | 2.2  |     |
| VC2663    | Hypothetical protein | 0.3  | 0.3 |
| VC2737    | Hypothetical protein | 0.4  |     |
| VCA0005   | Hypothetical protein | 0.2  | 0.2 |
| VCA0052   | Hypothetical protein | 0.4  |     |
| VCA0078   | Hypothetical protein |      | 3.5 |
| VCA0125   | Hypothetical protein | 2.7  |     |
| VCA0139   | Hypothetical protein | 2.8  | 0.5 |
| VCA0169   | Hypothetical protein | 0.6  |     |
| VCA0170   | Hypothetical protein | 0.3  |     |
| VCA0190   | Hypothetical protein | 2.1  |     |
| VCA0236   | Hypothetical protein | 0.2  |     |
| VCA0240   | Hypothetical protein | 2.1  |     |
| VCA0252   | Hypothetical protein |      | 0.4 |
| VCA0259   | Hypothetical protein | 2.1  |     |
| VCA0260   | Hypothetical protein | 2.2  | 2.5 |
| VCA0261   | Hypothetical protein | 5.0  | 5.9 |
| VCA0271   | Hypothetical protein | 2.4  |     |
| VCA0285   | Hypothetical protein | 2.0  |     |
| VCA0297   | Hypothetical protein | 2.5  |     |
| VCA0303   | Hypothetical protein | 2.0  | 2.2 |
| VCA0312   | Hypothetical protein | 2.4  |     |
| VCA0331   | Hypothetical protein | 4.7  | 5.5 |
| VCA0333   | Hypothetical protein | 2.9  |     |
| VCA0358   | Hypothetical protein | 2.2  | 2.4 |
| VCA0375   | Hypothetical protein | 2.5  |     |
| VCA0390   | Hypothetical protein | 2.2  |     |
| VCA0408   | Hypothetical protein | 2.3  |     |
| VCA0425   | Hypothetical protein | 2.0  |     |
| VCA0448   | Hypothetical protein | 2.4  | 2.3 |
| VCA0450   | Hypothetical protein | 6.2  |     |
| VCA0452   | Hypothetical protein | 3.2  |     |
| VCA0457   | Hypothetical protein | 2.1  |     |
| VCA0458   | Hypothetical protein | 2.6  | 2.5 |
| VCA0460   | Hypothetical protein | 2.3  |     |
| VCA0462   | Hypothetical protein | 2.6  |     |
| VCA0465   | Hypothetical protein |      | 3.0 |
| VCA0486   | Hypothetical protein | 0.5  |     |
| VCA0535   | Hypothetical protein | 5.3  |     |
| VCA0537   | Hypothetical protein |      | 2.3 |
| VCA0556   | Hypothetical protein | 0.4  |     |
| VCA0593   | Hypothetical protein | 3.2  |     |
| VCA0652   | Hypothetical protein | 0.4  |     |
| VCA0670   | Hypothetical protein |      | 2.6 |
| VCA0721   | Hypothetical protein | 0.2  |     |
| VCA0722   | Hypothetical protein |      | 0.4 |
| VCA0742   | Hypothetical protein | 2.2  |     |
| VCA0770   | Hypothetical protein | 9.0  |     |
| VCA0771   | Hypothetical protein | 8.6  |     |
| VCA0796   | Hypothetical protein | 0.5  |     |
| VCA0799   | Hypothetical protein | 2.5  |     |
| VCA0806   | Hypothetical protein | 2.1  |     |
| VCA0821   | Hypothetical protein | 0.2  | 0.1 |
| VCA0842   | Hypothetical protein |      | 2.8 |
| VCA0849_1 | Hypothetical protein | 3.8  |     |
| VCA0849_2 | Hypothetical protein | 3.6  |     |
| VCA0849_3 | Hypothetical protein | 3.7  |     |
| VCA0874   | Hypothetical protein | 43.1 | 5.5 |
| VCA0881   | Hypothetical protein | 0.5  |     |
| VCA0882   | Hypothetical protein | 0.5  |     |
| VCA0883   | Hypothetical protein | 0.4  | 2.4 |
| VCA0920   | Hypothetical protein | 4.1  |     |
| VCA0921   | Hypothetical protein | 0.4  |     |
| VCA0997   | Hypothetical protein | 0.3  |     |
| VCA1035   | Hypothetical protein | 0.5  |     |

---

**Hypothetical conserved**

|        |                                 |     |     |
|--------|---------------------------------|-----|-----|
| VC0131 | Hypothetical protein, conserved | 0.3 |     |
| VC0134 | Hypothetical protein, conserved | 0.3 |     |
| VC0153 | Hypothetical protein, conserved |     | 2.9 |
| VC0163 | Hypothetical protein, conserved | 0.3 |     |
| VC0239 | Hypothetical protein, conserved | 0.4 |     |
| VC0254 | Hypothetical protein, conserved | 2.9 |     |
| VC0264 | Hypothetical protein, conserved | 2.7 |     |
| VC0265 | Hypothetical protein, conserved | 0.4 |     |
| VC0428 | Hypothetical protein, conserved | 0.4 |     |
| VC0438 | Hypothetical protein, conserved | 2.9 |     |
| VC0519 | Hypothetical protein, conserved |     | 0.4 |
| VC0648 | Hypothetical protein, conserved | 2.4 |     |
| VC0661 | Hypothetical protein, conserved | 0.6 |     |
| VC0708 | Hypothetical protein, conserved | 2.2 |     |
| VC0710 | Hypothetical protein, conserved | 2.5 |     |
| VC0718 | Hypothetical protein, conserved |     | 2.9 |
| VC0747 | Hypothetical protein, conserved | 2.8 |     |
| VC0757 | Hypothetical protein, conserved | 0.4 |     |
| VC0765 | Hypothetical protein, conserved | 2.3 |     |
| VC0770 | Hypothetical protein, conserved | 0.1 | 0.3 |
| VC0845 | Hypothetical protein, conserved | 2.4 |     |
| VC0876 | Hypothetical protein, conserved | 2.0 |     |
| VC0882 | Hypothetical protein, conserved | 2.0 |     |
| VC0902 | Hypothetical protein, conserved | 0.4 |     |
| VC0913 | Hypothetical protein, conserved | 2.1 |     |
| VC0945 | Hypothetical protein, conserved | 0.2 |     |
| VC0962 | Hypothetical protein, conserved | 0.4 |     |
| VC0975 | Hypothetical protein, conserved |     | 3.4 |
| VC0976 | Hypothetical protein, conserved |     | 2.5 |
| VC0977 | Hypothetical protein, conserved | 0.2 |     |
| VC0981 | Hypothetical protein, conserved | 0.6 |     |
| VC1048 | Hypothetical protein, conserved | 2.2 |     |
| VC1055 | Hypothetical protein, conserved | 0.2 |     |
| VC1101 | Hypothetical protein, conserved | 2.2 |     |
| VC1121 | Hypothetical protein, conserved | 2.1 |     |
| VC1151 | Hypothetical protein, conserved | 2.9 |     |
| VC1153 | Hypothetical protein, conserved | 2.2 |     |
| VC1163 | Hypothetical protein, conserved | 0.5 |     |
| VC1198 | Hypothetical protein, conserved | 2.0 | 3.7 |
| VC1208 | Hypothetical protein, conserved | 0.3 |     |
| VC1217 | Hypothetical protein, conserved | 0.5 |     |
| VC1249 | Hypothetical protein, conserved | 0.3 |     |
| VC1259 | Hypothetical protein, conserved | 0.2 |     |
| VC1317 | Hypothetical protein, conserved | 0.5 |     |
| VC1364 | Hypothetical protein, conserved | 2.1 |     |
| VC1432 | Hypothetical protein, conserved | 0.3 |     |
| VC1433 | Hypothetical protein, conserved | 2.8 | 2.2 |
| VC1498 | Hypothetical protein, conserved | 0.4 |     |
| VC1523 | Hypothetical protein, conserved |     | 3.5 |
| VC1606 | Hypothetical protein, conserved | 0.4 |     |
| VC1628 | Hypothetical protein, conserved |     | 0.3 |
| VC1645 | Hypothetical protein, conserved |     | 3.5 |
| VC1647 | Hypothetical protein, conserved | 0.4 |     |
| VC1722 | Hypothetical protein, conserved | 3.1 |     |
| VC1731 | Hypothetical protein, conserved | 2.9 |     |
| VC1755 | Hypothetical protein, conserved | 0.4 |     |
| VC1766 | Hypothetical protein, conserved | 0.4 |     |
| VC1767 | Hypothetical protein, conserved | 0.6 |     |
| VC1811 | Hypothetical protein, conserved | 2.4 |     |
| VC1841 | Hypothetical protein, conserved | 0.4 |     |
| VC1842 | Hypothetical protein, conserved | 0.4 |     |
| VC1871 | Hypothetical protein, conserved | 0.1 |     |
| VC1893 | Hypothetical protein, conserved | 2.1 | 2.4 |
| VC1931 | Hypothetical protein, conserved | 4.4 | 3.6 |
| VC1938 | Hypothetical protein, conserved | 2.9 |     |
| VC1939 | Hypothetical protein, conserved | 5.3 | 4.7 |

|         |                                 |      |      |
|---------|---------------------------------|------|------|
| VC1989  | Hypothetical protein, conserved | 0.3  |      |
| VC2001  | Hypothetical protein, conserved |      | 2.5  |
| VC2014  | Hypothetical protein, conserved | 0.3  | 0.3  |
| VC2017  | Hypothetical protein, conserved | 0.5  |      |
| VC2039  | Hypothetical protein, conserved | 0.5  |      |
| VC2110  | Hypothetical protein, conserved | 0.2  |      |
| VC2112  | Hypothetical protein, conserved | 0.4  |      |
| VC2113  | Hypothetical protein, conserved | 0.5  |      |
| VC2146  | Hypothetical protein, conserved | 2.6  |      |
| VC2163  | Hypothetical protein, conserved | 2.2  |      |
| VC2172  | Hypothetical protein, conserved | 0.5  |      |
| VC2303  | Hypothetical protein, conserved | 0.5  |      |
| VC2378  | Hypothetical protein, conserved | 3.1  |      |
| VC2429  | Hypothetical protein, conserved | 0.5  |      |
| VC2434  | Hypothetical protein, conserved | 0.4  |      |
| VC2443  | Hypothetical protein, conserved | 0.4  |      |
| VC2498  | Hypothetical protein, conserved | 0.6  |      |
| VC2507  | Hypothetical protein, conserved | 3.3  |      |
| VC2512  | Hypothetical protein, conserved | 0.4  |      |
| VC2527  | Hypothetical protein, conserved | 0.5  |      |
| VC2546  | Hypothetical protein, conserved | 2.1  | 2.2  |
| VC2615  | Hypothetical protein, conserved | 10.0 | 5.9  |
| VC2620  | Hypothetical protein, conserved | 0.4  |      |
| VC2647  | Hypothetical protein, conserved | 7.3  |      |
| VC2686  | Hypothetical protein, conserved |      | 0.3  |
| VC2720  | Hypothetical protein, conserved | 2.0  |      |
| VCA0006 | Hypothetical protein, conserved | 0.2  | 0.3  |
| VCA0037 | Hypothetical protein, conserved |      | 2.4  |
| VCA0040 | Hypothetical protein, conserved | 0.5  |      |
| VCA0048 | Hypothetical protein, conserved | 0.3  |      |
| VCA0076 | Hypothetical protein, conserved | 0.3  |      |
| VCA0079 | Hypothetical protein, conserved | 0.5  |      |
| VCA0097 | Hypothetical protein, conserved | 0.4  |      |
| VCA0159 | Hypothetical protein, conserved | 2.7  |      |
| VCA0163 | Hypothetical protein, conserved | 2.8  |      |
| VCA0171 | Hypothetical protein, conserved | 0.2  |      |
| VCA0172 | Hypothetical protein, conserved | 0.3  | 0.3  |
| VCA0323 | Hypothetical protein, conserved | 0.5  |      |
| VCA0338 | Hypothetical protein, conserved | 2.0  | 2.6  |
| VCA0345 | Hypothetical protein, conserved |      | 2.5  |
| VCA0487 | Hypothetical protein, conserved | 0.3  |      |
| VCA0488 | Hypothetical protein, conserved | 0.5  |      |
| VCA0527 | Hypothetical protein, conserved |      | 2.4  |
| VCA0544 | Hypothetical protein, conserved | 2.0  |      |
| VCA0569 | Hypothetical protein, conserved |      | 3.0  |
| VCA0586 | Hypothetical protein, conserved | 2.5  |      |
| VCA0689 | Hypothetical protein, conserved |      | 15.0 |
| VCA0732 | Hypothetical protein, conserved | 0.3  |      |
| VCA0743 | Hypothetical protein, conserved |      | 0.3  |
| VCA0763 | Hypothetical protein, conserved | 0.3  |      |
| VCA0769 | Hypothetical protein, conserved | 9.7  |      |
| VCA0789 | Hypothetical protein, conserved | 2.2  |      |
| VCA0838 | Hypothetical protein, conserved | 2.3  |      |
| VCA0903 | Hypothetical protein, conserved | 6.2  |      |
| VCA0907 | Hypothetical protein, conserved | 0.5  |      |
| VCA0931 | Hypothetical protein, conserved | 2.4  |      |
| VCA0986 | Hypothetical protein, conserved |      | 6.2  |
| VCA1004 | Hypothetical protein, conserved | 2.4  |      |
| VCA1042 | Hypothetical protein, conserved | 2.3  |      |
| VCA1072 | Hypothetical protein, conserved | 2.2  |      |
| VCA1085 | Hypothetical protein, conserved |      | 2.6  |

## Supplemental Table 2. Bacterial strains and plasmids used in this study.

| Vibrio cholerae strains            |                                                                                                                                                                                                                                                                                                                | References             |
|------------------------------------|----------------------------------------------------------------------------------------------------------------------------------------------------------------------------------------------------------------------------------------------------------------------------------------------------------------|------------------------|
| FY_Vc_1                            | <i>Vibrio cholerae</i> O1 El Tor A1552, smooth variant, Rif                                                                                                                                                                                                                                                    | 1                      |
| FY_Vc_0099                         | $\Delta$ VCA0952 ( <i>vpsT</i> )                                                                                                                                                                                                                                                                               | 2                      |
| FY_Vc_2272                         | $\Delta$ VCO665 ( <i>vpsR</i> )                                                                                                                                                                                                                                                                                | 1                      |
| FY_Vc_2641                         | $\Delta$ VCA0184                                                                                                                                                                                                                                                                                               | This study             |
| FY_Vc_2647                         | $\Delta$ VCA0933 ( <i>cspV</i> )                                                                                                                                                                                                                                                                               | This study             |
| FY_Vc_283                          | $\Delta$ mshA                                                                                                                                                                                                                                                                                                  | 3                      |
| FY_Vc_3380                         | $\Delta$ VCO934 ( <i>vpsL</i> )                                                                                                                                                                                                                                                                                | 4                      |
| FY_Vc_4450                         | $\Delta$ VOC1142                                                                                                                                                                                                                                                                                               | This study             |
| FY_Vc_4455                         | $\Delta$ VCA0166 ( <i>cspA</i> )                                                                                                                                                                                                                                                                               | This study             |
| FY_Vc_9569                         | $\Delta$ VOC1415 $\Delta$ VCA0017 ( $\Delta$ <i>hcp1</i> $\Delta$ <i>hcp2</i> )                                                                                                                                                                                                                                | this study             |
| FY_Vc_9735                         | $\Delta$ <i>hcp1</i> $\Delta$ <i>hcp2</i> -Tn7- <i>hcp1</i>                                                                                                                                                                                                                                                    | 5                      |
| FY_Vc_9904                         | $\Delta$ <i>cspV</i> - Tn7- <i>cspV</i>                                                                                                                                                                                                                                                                        | This study             |
| FY_Vc_9903                         | $\Delta$ VOC2647 ( <i>aphA</i> )                                                                                                                                                                                                                                                                               | This study             |
| <b>Other strains</b>               |                                                                                                                                                                                                                                                                                                                |                        |
| <i>E. coli</i> S17-1 $\lambda$ pir | Tpr Smr <i>rec, thi, pro, rK-mK+ RP4:2-Tc:MuKm</i> Tn7 $\lambda$ pir                                                                                                                                                                                                                                           | 6                      |
| <i>E. coli</i> CC118 $\lambda$ pir | $\Delta$ ( <i>ara-leu</i> ) <i>araD</i> $\Delta$ <i>lacX74 galE galK phoA</i> 20 <i>thi-1 rpoB argE</i> (Am) <i>recA1 pir</i>                                                                                                                                                                                  | 7                      |
| <i>E. coli</i> MC4100              | F' <i>araD139</i> $\Delta$ ( <i>argF-lac</i> )U169 <i>rpsL150</i> ( <i>str<sup>r</sup></i> ) <i>relA1 deoC1 rbsR fthD5301 fruA25</i> I'                                                                                                                                                                        | Ottemann lab, UCSC     |
| <i>Aeromonas</i> sp.               | <i>Aeromonas</i> sp.                                                                                                                                                                                                                                                                                           | Sison-Mangus lab, UCSC |
| FY_Ye_71                           | <i>Aeromonas</i> sp. Strepr                                                                                                                                                                                                                                                                                    |                        |
| <b>Plasmids</b>                    |                                                                                                                                                                                                                                                                                                                |                        |
| pMCM11                             | pGP704::mTn7- <i>gfp</i> , Gmr Ampr                                                                                                                                                                                                                                                                            |                        |
| pUX-BF13                           | oriR6K helper plasmid, <i>mobI oriT</i> , provides the Tn7 transposition function <i>in trans</i> , Ampr 7                                                                                                                                                                                                     |                        |
| pGP704- sacB28                     | pGP704 derivative; <i>mobI oriT sacB</i> , Ampr                                                                                                                                                                                                                                                                | 9                      |
| pGP704- sacB29                     | pGP704- <i>sacB28:: VCA0184</i>                                                                                                                                                                                                                                                                                | This study             |
| pGP704- sacB30                     | pGP704- <i>sacB28:: cspV</i>                                                                                                                                                                                                                                                                                   | This study             |
| pGP704- sacB31                     | pGP704- <i>sacB28:: VC1142</i>                                                                                                                                                                                                                                                                                 | This study             |
| pGP704- sacB32                     | pGP704- <i>sacB28:: cspV</i>                                                                                                                                                                                                                                                                                   | This study             |
| pGP704- sacB33                     | pGP704- <i>sacB28:: aphA</i>                                                                                                                                                                                                                                                                                   | This study             |
| pGP704- sacB34                     | pGP704- <i>sacB28:: hcp1</i>                                                                                                                                                                                                                                                                                   | This study             |
| pGP704- sacB35                     | pGP704- <i>sacB28:: hcp2</i>                                                                                                                                                                                                                                                                                   | This study             |
| <b>Reference number</b>            | <b>Reference cited</b>                                                                                                                                                                                                                                                                                         |                        |
| 1                                  | Yildiz FH, Dolganov NA, Schoolnik GK. (2001). <i>VpsR</i> , a member of the response regulators of the two-component regulatory systems is required for expression of <i>vps</i> biosynthesis genes and EPS(Etr)-associated phenotypes in <i>Vibrio cholerae</i> O1 El Tor. J Bacteriol <b>183</b> : 1716-1726 |                        |
| 2                                  | Casper-Lindley C, Yildiz FH. (2004). <i>VpsT</i> is a transcriptional regulator required for expression of <i>vps</i> biosynthesis genes and the development of rugose colonial morphology in <i>Vibrio cholerae</i> O1 El Tor. J Bacteriol. <b>186</b> (5):1574-8.                                            |                        |
| 3                                  | Jones CJ, Utada A, Davis KR, Thongsomboon W, Sanchez DZ, Banakar <i>et al.</i> (2015). C-di-GMP Regulates Motile to Sessile Transition by Modulating MshA Pili Biogenesis and Near-Surface Motility Behavior in <i>Vibrio cholerae</i> . PLoS Pathog <b>11</b> (10), p.e1005068.                               |                        |
| 4                                  | Fong JCN, Syed KA, Klose KE, Yildiz FH. (2010). Role of <i>Vibrio</i> polysaccharide ( <i>vps</i> ) genes in VPS production, biofilm formation and <i>Vibrio cholerae</i> pathogenesis. Microbiol <b>156</b> : 2757-2769                                                                                       |                        |
| 5                                  | Cheng AT, Ottemann KM, Yildiz FH. (2015). <i>Vibrio cholerae</i> Response Regulator VxrB Controls Colonization and Regulates the Type VI Secretion System. PLoS Pathog <b>11</b> (5): e1004933.                                                                                                                |                        |
| 6                                  | de Lorenzo V, Timmis KN. (1994). Analysis and construction of stable phenotypes in gram-negative bacteria with Tn5- and Tn10-derived minitransposons. Methods Enzymol <b>235</b> : 386- 405.                                                                                                                   |                        |
| 7                                  | Hammer, B. K., & Bassler, B. L. (2007). Regulatory small RNAs circumvent the conventional quorum sensing pathway in pandemic <i>Vibrio cholerae</i> . Proc Natl Acad Sci <b>104</b> (27), 11145- 11149.                                                                                                        |                        |

- 8 Bao Y, Lies DP, Fu H, Roberts GP. (1991). An improved Tn7-based system for the single-copy insertion of cloned genes into chromosomes of gram-negative bacteria. *Gene* **20**;109(1):167-8.
- 9 Casper-Lindley, C., and F. H. Yildiz. (2004). VpsT is a transcriptional regulator required for expression of *vps* biosynthesis genes and the development of rugose colonial morphology in *Vibrio cholerae* O1 El Tor. *J. Bacteriol* **186**:1574–1578.

**Supplementary Figure 1.** SEM images showing *mshA* attached to *D. magna*.

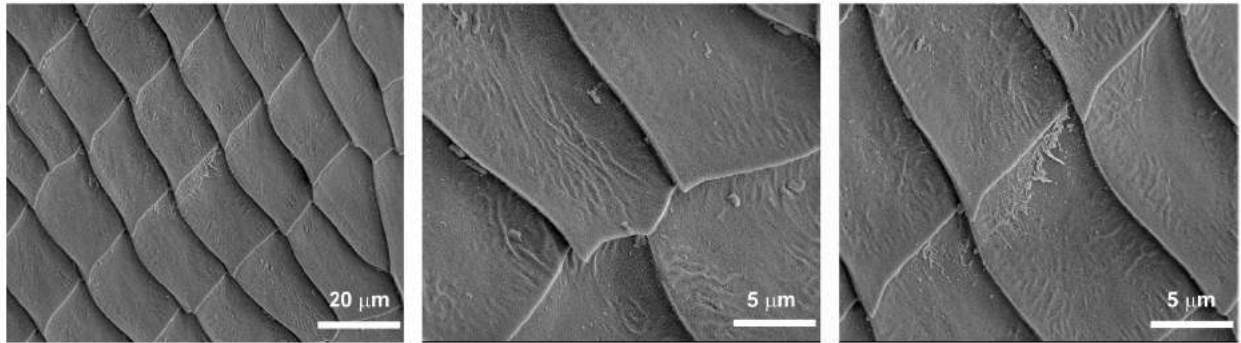

**Supplementary Figure 2.** Growth curve of wild-type *V. cholerae* grown at 37°C then shifted to 25°C (gray squares) or 15°C (white circles) or maintained at 37°C (black triangles) for comparison. Closed arrow indicates time point at which cultures were shifted. Open arrow indicates time point at which samples were taken for microarray analysis.

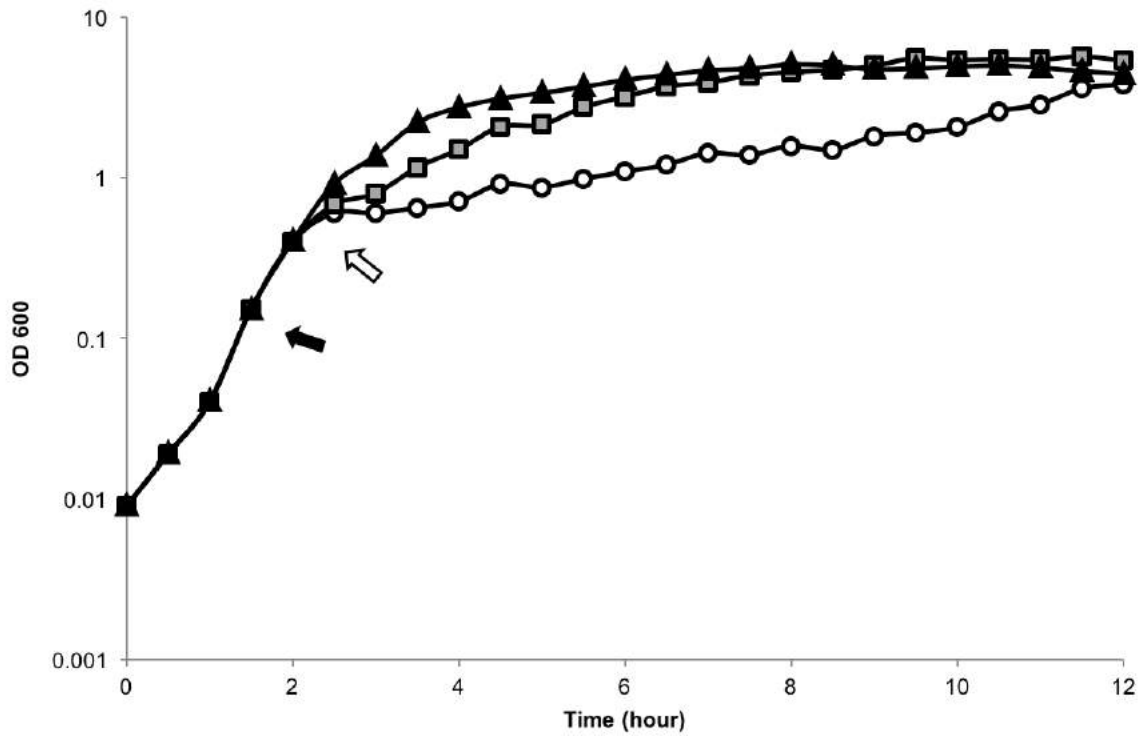

Supplement: AEM.00807-16_zam999117275so1.pdf [file AEM.00807-16_zam999117275so1.pdf]
